# Supplementary material for: A cobalt(ii) chain based on pymca generated in situ from the hydrolysis of 2-cyanopyrimidine: spin canting and magnetic relaxation
Source: Royal Society of Chemistry journal article supplement (doi:10.1039/c9ra05354a), 2019-01-01
Supplement: c9ra05354a1.pdf [file c9ra05354a1.pdf]

**Electronic Supplementary Information**

**A Cobalt (II) Chain Based on Pymca Generated in  
Situ from the Hydrolysis of 2-Cyanopyrimidine:  
Spin Canting and Magnetic relaxation**

*Jie Zhang,<sup>a</sup> Qian-Nan Zhao,<sup>a</sup> Feng Yang,<sup>b</sup> Lei Yin,<sup>b</sup> Miao-Miao Li,<sup>a</sup> Zhenxing Wang,<sup>b</sup> Zhongwen  
Ouyang,<sup>b</sup> Zheng-Cai Xia,<sup>\*b</sup> and Tuo-Ping Hu<sup>\*a</sup>*

<sup>a</sup> Department of Chemistry, College of Science, North University of China, Xueyuan Road 3,  
Taiyuan 030051, PR China.

<sup>b</sup> Wuhan National High Magnetic Field Center & School of Physics, Huazhong University of  
Science and Technology, Wuhan 430074, PR China

**Table S1.** Crystallographic data of complex **1**

| <b>complex</b>                                    | <b>1</b>                                                                         |
|---------------------------------------------------|----------------------------------------------------------------------------------|
| Empirical formula                                 | C <sub>10</sub> H <sub>18</sub> Co <sub>2</sub> N <sub>4</sub> O <sub>14</sub> S |
| Formula weight                                    | 568.20                                                                           |
| Crystal system                                    | Tetragonal                                                                       |
| space group                                       | $P\bar{4}2_1c$                                                                   |
| $a$ (Å)                                           | 9.5941(13)                                                                       |
| $b$ (Å)                                           | 9.5941(13)                                                                       |
| $c$ (Å)                                           | 20.329(3)                                                                        |
| $\alpha$ (°)                                      | 90                                                                               |
| $\beta$ (°)                                       | 90                                                                               |
| $\gamma$ (°)                                      | 90                                                                               |
| $V$ (Å <sup>3</sup> )                             | 1871.2(6)                                                                        |
| $T$ (K)                                           | 296(2)                                                                           |
| $Z$                                               | 4                                                                                |
| $\rho_{\text{calcd}}$ (g cm <sup>-3</sup> )       | 2.017                                                                            |
| $F(000)$                                          | 1152                                                                             |
| $\square$ (Å)                                     | 0.71073                                                                          |
| R(int)                                            | 0.0568                                                                           |
| final $R_1$ , $\square R_2$ [ $I > 2\square(I)$ ] | 0.0568, 0.1387                                                                   |
| $R_1$ , $\square R_2$ all data                    | 0.0630, 0.1387                                                                   |
| Data / restraints / parameters                    | 2103 / 1 / 143                                                                   |
| Largest diff. Peak and hole[e·Å <sup>-3</sup> ]   | 0.924 and -0.573                                                                 |
| goodness of fit, GOF                              | 1.071                                                                            |
| CCDC number                                       | 1949664                                                                          |

**Table S2.** Bond lengths [ $\text{\AA}$ ] and angles [ $^\circ$ ] for complex **1**.

|              |                                         | Complex <b>1</b> |                                         |          |            |
|--------------|-----------------------------------------|------------------|-----------------------------------------|----------|------------|
| <b>Table</b> | Co1 -O1W <sup>i</sup>                   | 2.077(6)         | Co1-N1                                  | 2.158(6) | <b>S3.</b> |
|              | Co1-O1W                                 | 2.077(6)         | Co1-O1 <sup>i</sup>                     | 2.108(5) |            |
|              | Co1-N1 <sup>i</sup>                     | 2.158(6)         | Co1-O1                                  | 2.108(5) |            |
|              | Co2-O2 <sup>ii</sup>                    | 2.119(6)         | Co2-N2 <sup>ii</sup>                    | 2.141(6) |            |
|              | Co2-O2W <sup>ii</sup>                   | 2.069(8)         | Co2-O2                                  | 2.119(6) |            |
|              | Co2-O2W                                 | 2.069(8)         | Co2-N2                                  | 2.141(6) |            |
|              | O1-Co1-N1 <sup>i</sup>                  | 86.8(2)          | O1-Co1-N1                               | 78.4(2)  |            |
|              | O1 <sup>i</sup> -Co1-N1                 | 86.8(2)          | O1 <sup>i</sup> -Co1-O1                 | 157.0(3) |            |
|              | O1W <sup>i</sup> -Co1-O1W               | 88.1(3)          | O1W-Co1-O1 <sup>i</sup>                 | 93.4(2)  |            |
|              | O2W <sup>ii</sup> -Co2-O2W              | 88.7(5)          | O2W-Co2-N2                              | 99.8(2)  |            |
|              | O2W-Co2-N2 <sup>ii</sup>                | 91.0(2)          | O2-Co2-N2                               | 78.3(2)  |            |
|              | O2W-Co2-O2 <sup>ii</sup>                | 87.8(3)          | O2-Co2-N2 <sup>ii</sup>                 | 91.6(2)  |            |
|              | O1W-Co1-N1                              | 174.3(2)         | O1W-Co1-O1                              | 103.1(2) |            |
|              | O1W <sup>i</sup> -Co1-N1                | 86.3(2)          | O1W <sup>i</sup> -Co1-O1                | 93.4(2)  |            |
|              | O1W-Co1-N1 <sup>i</sup>                 | 86.3(2)          | N1-Co1-N1 <sup>i</sup>                  | 99.3(3)  |            |
|              | O1W <sup>i</sup> -Co1-N1 <sup>i</sup>   | 174.3(2)         | O1 <sup>i</sup> -Co1-N1 <sup>i</sup>    | 78.4(2)  |            |
|              | O1W <sup>i</sup> -Co1-O1 <sup>i</sup>   | 103.1(2)         | O2W <sup>ii</sup> -Co2-N2               | 91.0(2)  |            |
|              | O2W <sup>ii</sup> -Co2-O2               | 87.8(3)          | O2W <sup>ii</sup> -Co2-N2 <sup>ii</sup> | 99.8(2)  |            |
|              | O2W <sup>ii</sup> -Co2-O2 <sup>ii</sup> | 175.9(3)         | O2-Co2-O2 <sup>ii</sup>                 | 95.8(3)  |            |
|              | O2W-Co2-O2                              | 175.9(3)         |                                         |          |            |

Symmetry transformations used to generate equivalent atoms: i: -x+1, -y, z, ii: -x+1, -y+1, z.

**Hydrogen bonds for complex 1.** Bond lengths [ $\text{\AA}$ ] and angles [ $^\circ$ ].

| D—H $\cdots$ A             | d(D—H) | d(H $\cdots$ A) | d(D $\cdots$ A) | $\angle$ (D—H $\cdots$ A) |
|----------------------------|--------|-----------------|-----------------|---------------------------|
| O(1W)—H(1A) $\cdots$ O(4)  | 0.85   | 1.91            | 2.735(9)        | 164                       |
| O(1W)—H(1B) $\cdots$ O(2)  | 0.85   | 1.96            | 2.793(8)        | 168                       |
| O(2W)—H(2A) $\cdots$ O(3)  | 0.87   | 2.06            | 2.913(12)       | 168                       |
| O(2W)—H(2B) $\cdots$ O(3W) | 0.74   | 2.34            | 2.961(14)       | 143                       |
| O(3W)—H(10A) $\cdots$ O(4) | 0.85   | 2.16            | 2.847(16)       | 137                       |
| O(3W)—H(10B) $\cdots$ O(3) | 0.85   | 2.40            | 2.683(12)       | 100                       |

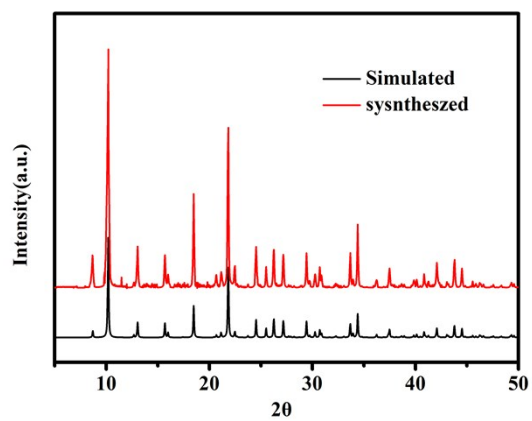

Fig. S1 The PXR D pattern of 1.

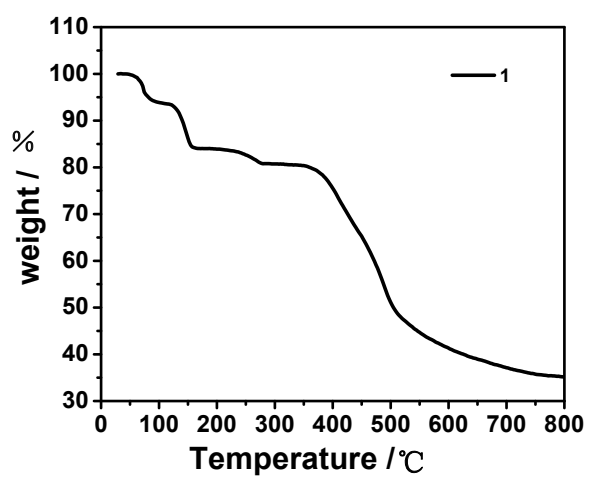

Fig. S2 The TG curves of complex 1.

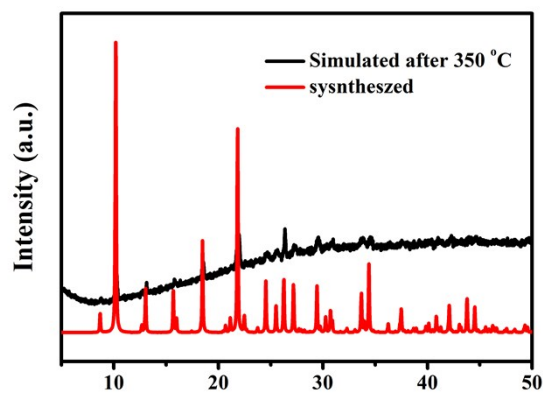

Fig. S3 The PXR D pattern of the 1 heated to 350 °C.

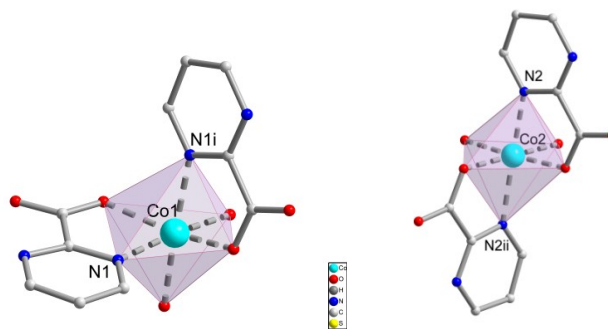

**Fig. S4** The distorted octahedral coordination geometry of Co1 and Co2 ( $N1-Co1-N1i = 99.3(3)^\circ$  (left),  $N2-Co2-N2i = 164.9(3)^\circ$  (right)).

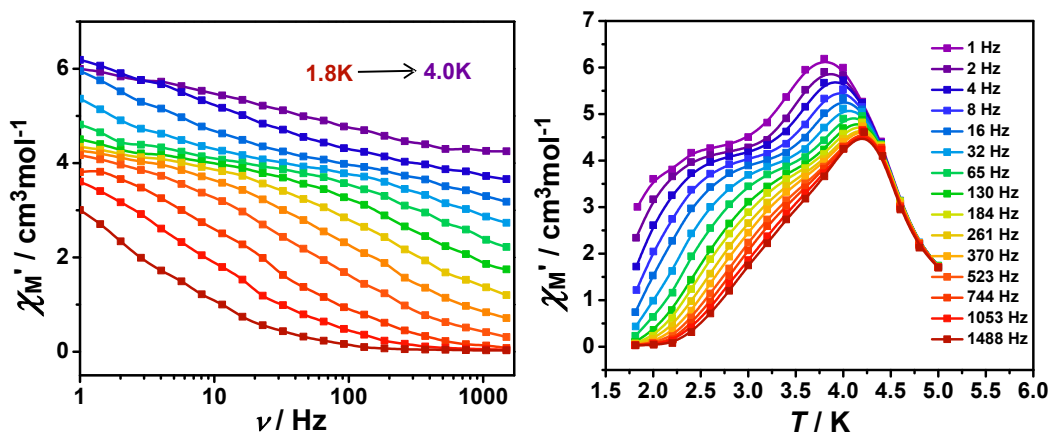

**Fig. S5** Frequency dependence of in-phase (left) and temperature dependence of in-phase (right) components of the ac susceptibility for the complex **1** in zero applied static field with a 5 Oe oscillating field at a frequency of 1–1488 Hz.

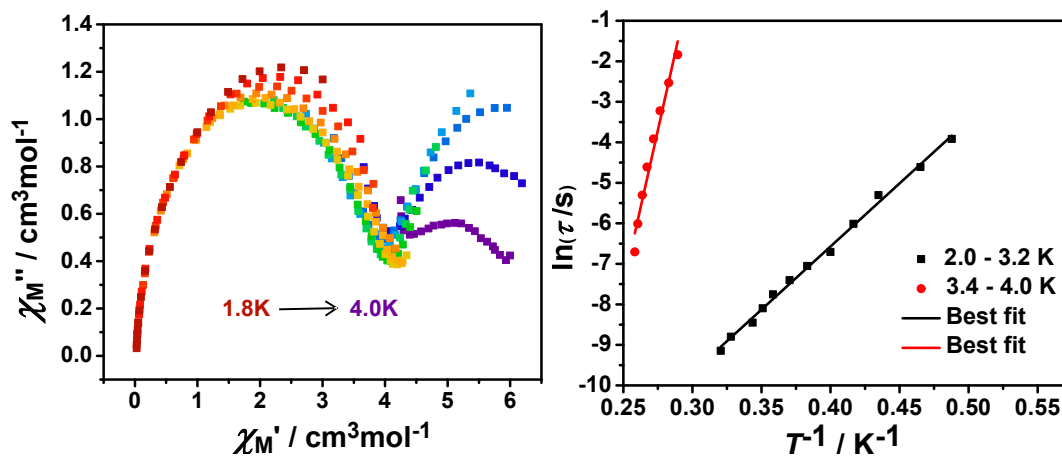

**Fig. S6** (a) A plot of cole-cole curve, (b) the plot of  $\ln\tau$  vs.  $1/T$ .

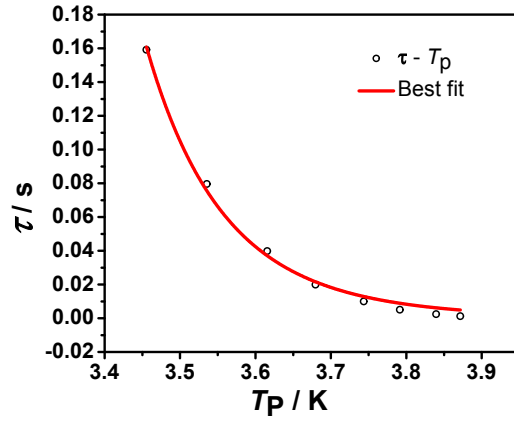

**Fig. S7** The plot of  $\tau$  vs.  $T_p$  for **1** was fitted by the conventional critical scaling law of the spin dynamics as described by  $\tau = \tau_0 [(T_p - T_f)/T_f]^{-z\nu}$ .
